# Supplementary figures and images for: Inhibition of homophilic dimerization and disruption of cell adhesion by P-cadherin-specific small molecules from SPR-based assays
Source: Royal Society of Chemistry journal article supplement (doi:10.1039/c8cc01964a), 2018-01-01

1 mM EDTA

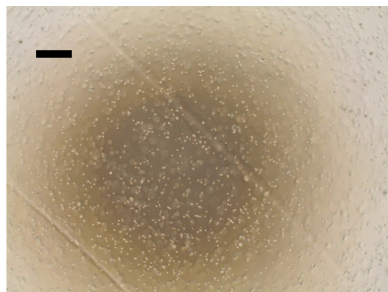

500  $\mu$ M #4

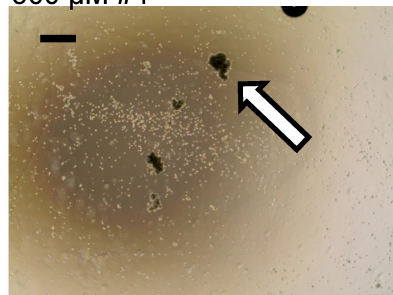

Supplement: c8cc01964a10.pdf [file c8cc01964a10.pdf]

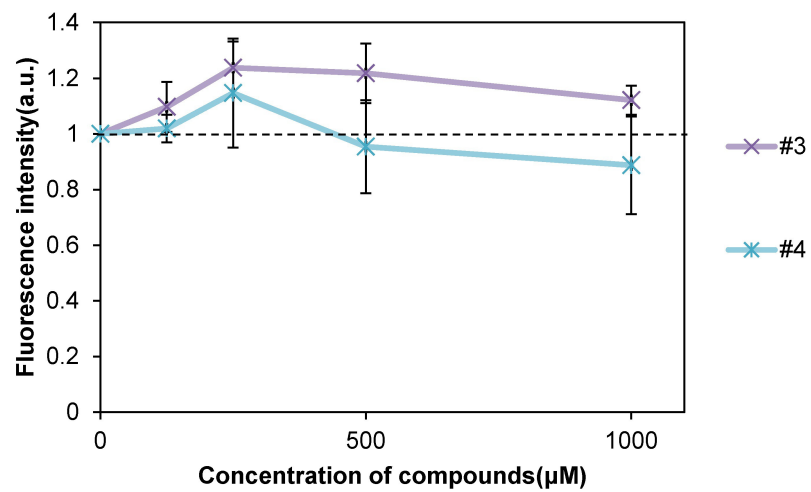

Supplement: c8cc01964a11.pdf [file c8cc01964a11.pdf]

*P-cadherin Plots*

#1  $R_{MAX} = 1.7$  RU

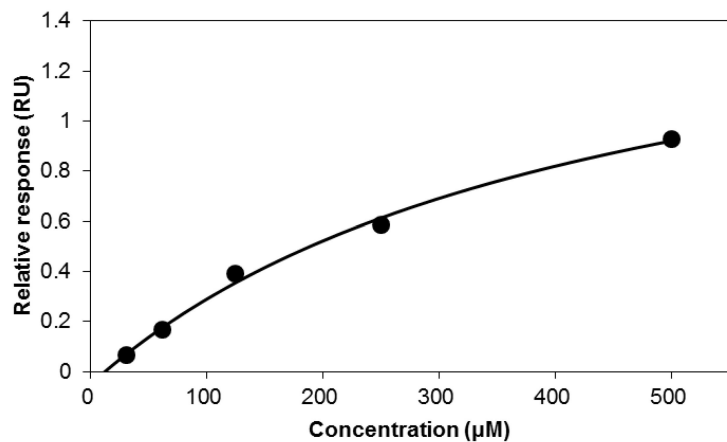

#3

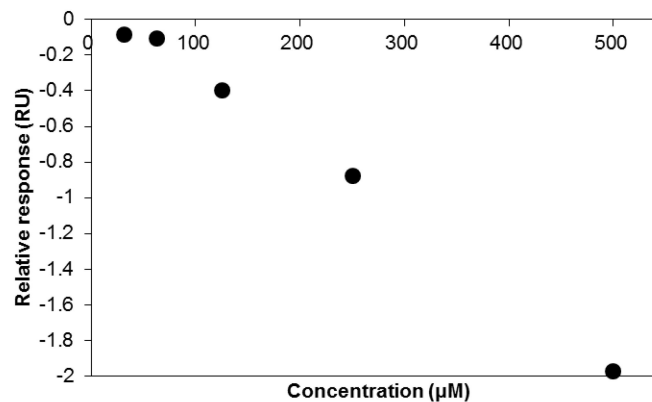

#4

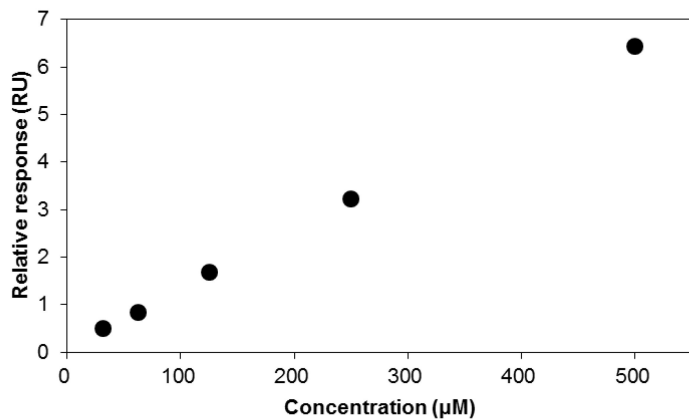

#5  $R_{MAX} = 17.4$  RU

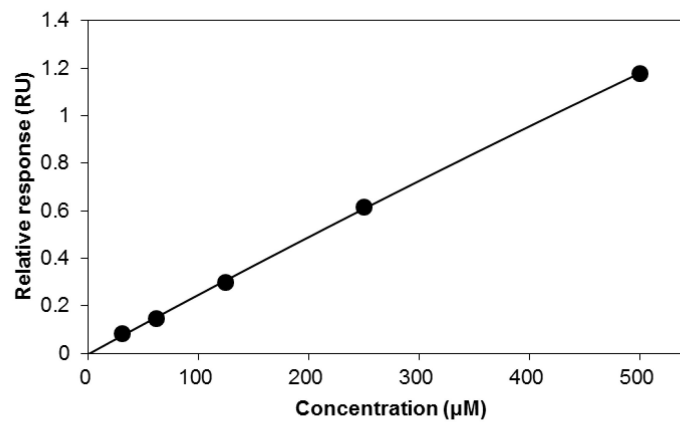

Supplement: c8cc01964a4.pdf [file c8cc01964a4.pdf]

*E-cadherin sensorgrams*

#1

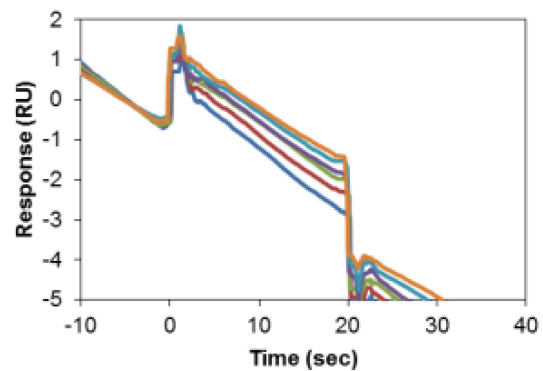

#2

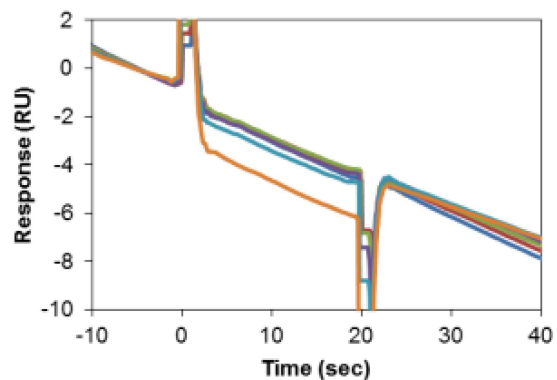

#3

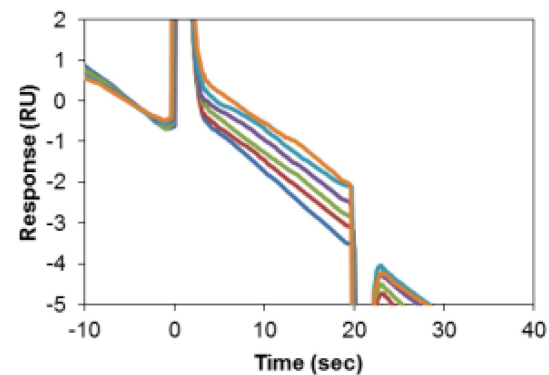

#4

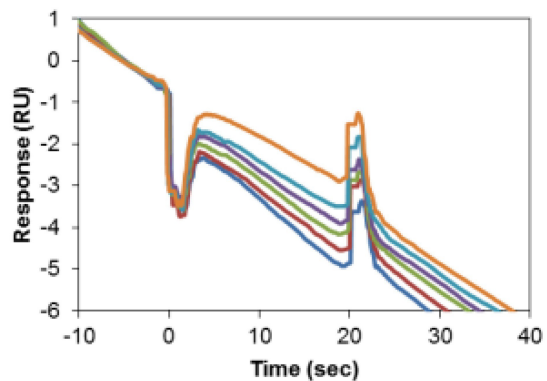

#5

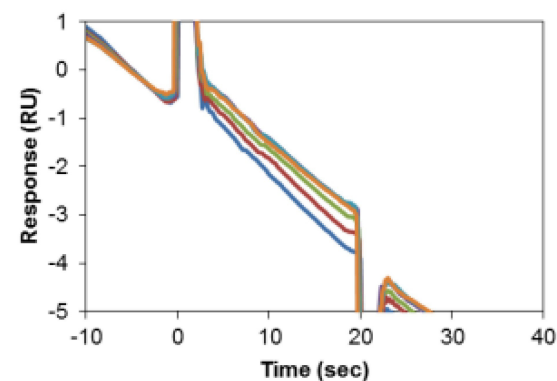

Supplement: c8cc01964a9.pdf [file c8cc01964a9.pdf]
